# Supplementary material
Source: PubMed Central journal article supplement (PMC2664292)

# Intermolecular Silacarbonyl Ylide Cycloadditions: A Direct Pathway to Oxasilacyclopentenes

*Laura E. Bourque and K. A. Woerpel\**

*Department of Chemistry, University of California,*

*Irvine, California, 92697-2025*

## Supporting Information

### Contents:

|      |                                                      |     |
|------|------------------------------------------------------|-----|
| I.   | Silacarbonyl Cycloadditions.....                     | S-2 |
| II.  | Silacyclopropene Control Experiment.....             | S-5 |
| III. | Oxasilacyclopentene Functionalization.....           | S-5 |
| IV.  | Stereochemical Proofs of Dioxasilacyclopentanes..... | S-8 |
| V.   | References.....                                      | S-8 |
| VI.  | Selected Spectra.....                                | S-9 |

### Experimental Section

**General.**  $^1\text{H}$  NMR and  $^{13}\text{C}$  NMR spectra were recorded at room temperature using Bruker DRX 400, DRX 500, or DRX 600 spectrometers, as indicated. The data are reported as follows: chemical shift in ppm from an internal tetramethylsilane standard on the  $\delta$  scale, multiplicity (br = broad, s = singlet, d = doublet, t = triplet, q = quartet, m = multiplet), coupling constants (Hz), and integration. Due to difficulties with purification for certain products, only characteristic peaks are listed in tabulated  $^1\text{H}$  NMR spectroscopic data. High resolution mass spectra was acquired on a VG analytical 7070E or Fisions Autospec spectrometer, and were obtained by peak matching. Microanalyses were performed by Atlantic Microlabs, Norcross, GA. Analytical thin layer chromatography was performed on EM reagents 0.25 mm silica gel 60-F plates. Liquid chromatography was performed using forced flow (flash chromatography) of the indicated solvent system on EM reagents silica gel ( $\text{SiO}_2$ ) 60 (230-400). Silacyclopropanes were stored and manipulated in an Innovative Technologies nitrogen dry box. All reactions were performed under an atmosphere of nitrogen or argon in glassware that had been flame-dried under a stream of nitrogen or under vacuum. Solvents were distilled or filtered through alumina before use. Sodium hydride and potassium hydride were used dry and weighed out in a nitrogen dry box. Cyclohexene silacyclopropane was constructed by known methods.<sup>1,2</sup>

## I. Silacarbonyl Cycloadditions

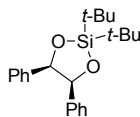

7

**Dioxasilacyclopentane 7.** To a solution of benzaldehyde (0.212 g, 2.00 mmol) in 6.7 mL of toluene was added silacyclopropane **6** (0.224 g, 1.00 mmol). AgOTf (0.003 g, 0.01 mmol) was then added. The brown solution was maintained at ambient temperature for 15 min, at which point the mixture was concentrated *in vacuo*. The resultant yellow oil as purified by flash chromatography (98:2 hexanes:EtOAc) to afford **7** (0.255 g, 72%) as a colorless oil:  $^1\text{H}$  NMR (400 MHz,  $\text{CDCl}_3$ )  $\delta$  7.17–7.30 (m, 10H), 4.80 (s, 2H), 1.26 (s, 18H);  $^{13}\text{C}$  NMR (125 MHz,  $\text{CDCl}_3$ )  $\delta$  139.0, 128.3, 128.1, 126.8, 84.6, 27.4, 21.6; IR (thin film) 2934, 2859, 1474, 1209, 1024, 853  $\text{cm}^{-1}$ ; HRMS (ESI)  $m/z$  calcd for  $\text{C}_{22}\text{H}_{30}\text{O}_2\text{SiNa}$  ( $\text{M} + \text{Na}$ ) $^+$  355.2093, found 355.2101. Anal. Calcd for  $\text{C}_{22}\text{H}_{30}\text{O}_2\text{Si}$ : C, 74.53; H, 8.53. Found: C, 74.08; H, 8.55.

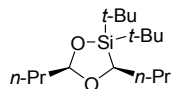

9

**Dioxasilacyclopentane acetal 9.** To a solution of *n*-butyraldehyde (0.144 g, 2.00 mmol) in 6.7 mL of toluene was added silacyclopropane **6** (0.224 g, 1.00 mmol).  $\text{CuBr}_2$  (0.011 g, 0.05 mmol) was then added. The brown solution was maintained at ambient temperature for 12 h, at which point the mixture was concentrated *in vacuo*. The resultant yellow oil as purified by flash chromatography (98:2 hexanes:EtOAc) to afford **9** (0.253 g, 89%) as a colorless oil:  $^1\text{H}$  NMR (500 MHz,  $\text{CDCl}_3$ )  $\delta$  4.87 (t,  $J = 4.0$ , 1H), 3.52–3.55 (m, 1H), 1.94–2.09 (m, 1H), 1.70–1.76 (m, 1H), 1.59–1.67 (m, 3H), 1.45–1.51 (m, 2H), 1.35–1.41 (m, 1H), 1.08 (s, 9H), 1.07 (s, 9H), 0.93–0.99 (m, 6H);  $^{13}\text{C}$  NMR (125 MHz,  $\text{CDCl}_3$ )  $\delta$  102.7, 70.0, 38.6, 33.4, 28.3, 27.9, 22.1, 20.6, 20.5, 17.8, 14.1; IR (thin film) 2935, 2860, 1473, 1365, 1009, 825  $\text{cm}^{-1}$ ; HRMS (APCI)  $m/z$  calcd for  $\text{C}_{16}\text{H}_{35}\text{O}_2\text{Si}$  ( $\text{M} + \text{H}$ ) $^+$  287.2406, found 287.2401. Anal. Calcd for  $\text{C}_{16}\text{H}_{34}\text{O}_2\text{Si}$ : C, 67.07; H, 11.96. Found: C, 66.88; H, 11.92.

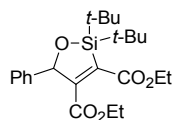

11

**Representative procedure for the synthesis of oxasilacyclopentenes (oxasilacyclopentene 11).** To a solution of benzaldehyde (0.109 g, 1.00 mmol) and diethyl acetylenedicarboxylate (0.170 g, 1.00 mmol) in 6.7 mL of toluene was added silacyclopropane **6** (0.247 g, 1.10 mmol). AgOTf (0.003 g, 0.01 mmol) was then added. The brown solution was maintained at ambient temperature for 15 min, at which point the mixture was concentrated *in vacuo*. The resultant yellow oil as purified by flash chromatography

(95:5 hexanes:EtOAc) to afford **11** (0.356 g, 85%) as a yellow oil:  $^1\text{H}$  NMR (500 MHz,  $\text{CDCl}_3$ )  $\delta$  7.27–7.38 (m, 5H), 5.92 (s, 1H), 4.28–4.31 (m, 2H), 4.03–4.07 (m, 2H), 1.34 (t,  $J = 7.2$ , 3H), 1.15 (s, 9H), 1.11 (s, 9H), 1.03 (t,  $J = 7.1$ , 3H);  $^{13}\text{C}$  NMR (125 MHz,  $\text{CDCl}_3$ )  $\delta$  167.9, 164.0, 154.9, 139.6, 139.4, 128.5, 128.4, 127.8, 84.8, 61.1, 61.0, 27.7, 27.2, 22.6, 21.0, 14.3, 13.8; IR (thin film) 3032, 2860, 1721, 1240, 1053, 825  $\text{cm}^{-1}$ ; HRMS (ESI)  $m/z$  calcd for  $\text{C}_{23}\text{H}_{34}\text{O}_5\text{SiNa}$  ( $\text{M} + \text{Na}$ ) $^+$  441.2073, found 441.2077. Anal. Calcd for  $\text{C}_{23}\text{H}_{34}\text{O}_5\text{Si}$ : C, 65.99; H, 8.19. Found: C, 65.73; H, 8.29.

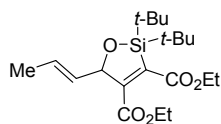**13a**

**Oxasilacyclopentene 13a.** The representative procedure for the synthesis of oxasilacyclopentenes was followed using crotonaldehyde (0.035 g, 0.50 mmol), diethyl acetylenedicarboxylate (0.085 g, 0.50 mmol), silacyclopropane **6** (0.123 g, 0.55 mmol), AgOTf (0.002 g, 0.01 mmol), and 6.7 mL of toluene for 15 min. Purification by flash chromatography (95:5 hexanes:EtOAc) afforded **13a** (0.157 g, 82%) as a colorless oil:  $^1\text{H}$  NMR (400 MHz,  $\text{CDCl}_3$ )  $\delta$  5.82–5.90 (m, 1H), 5.42–5.47 (m, 1H), 5.32–5.34 (m, 1H), 4.21–4.28 (m, 4H), 1.72 (d,  $J = 6.6$ , 3H), 1.26–1.33 (m, 6H), 1.12 (s, 9H), 1.05 (s, 9H);  $^{13}\text{C}$  NMR (125 MHz,  $\text{CDCl}_3$ )  $\delta$  167.8, 164.1, 155.0, 137.4, 130.1, 128.9, 83.7, 61.2, 60.9, 27.5, 27.1, 22.0, 20.7, 17.7, 14.2, 14.1; IR (thin film) 2936, 2862, 1732, 1257, 1038, 824  $\text{cm}^{-1}$ ; HRMS (ESI)  $m/z$  calcd for  $\text{C}_{20}\text{H}_{34}\text{O}_5\text{SiNa}$  ( $\text{M} + \text{Na}$ ) $^+$  405.2073, found 405.2076.

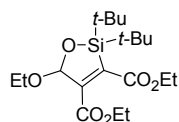**13b**

**Oxasilacyclopentene 13b.** The representative procedure for the synthesis of oxasilacyclopentenes was followed using ethyl formate (0.074 g, 1.00 mmol), diethyl acetylenedicarboxylate (0.170 g, 1.00 mmol), silacyclopropane **6** (0.247 g, 1.10 mmol), AgOTf (0.003 g, 0.01 mmol), and 6.7 mL of toluene for 15 min. Purification by flash chromatography (95:5 hexanes:EtOAc) afforded **13b** (0.248 g, 64%) as a colorless oil:  $^1\text{H}$  NMR (400 MHz,  $\text{CDCl}_3$ )  $\delta$  5.82 (s, 1H), 4.18–4.32 (m, 4H), 3.87–3.95 (m, 1H), 3.65–3.73 (m, 1H), 1.28–1.33 (m, 6H), 1.24 (t,  $J = 7.0$ , 3H), 1.13 (s, 9H), 1.04 (s, 9H);  $^{13}\text{C}$  NMR (125 MHz,  $\text{CDCl}_3$ )  $\delta$  168.3, 162.9, 148.8, 143.1, 103.0, 64.7, 61.2, 61.0, 27.4, 27.1, 21.0, 20.7, 15.3, 14.2, 14.0; IR (thin film) 2935, 2861, 1720, 1241, 1029, 825  $\text{cm}^{-1}$ ; HRMS (ESI)  $m/z$  calcd for  $\text{C}_{19}\text{H}_{34}\text{O}_6\text{SiNa}$  ( $\text{M} + \text{Na}$ ) $^+$  409.2022, found 409.2020. Anal. Calcd for  $\text{C}_{19}\text{H}_{34}\text{O}_6\text{Si}$ : C, 59.04; H, 8.87. Found: C, 59.20; H, 8.88.

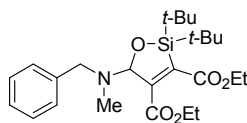**13c**

**Oxasilacyclopentene 13c.** The representative procedure for the synthesis of oxasilacyclopentenes was followed using *N*-methyl-*N*-(benzyl)-formamide (0.111 g, 0.75 mmol), diethyl acetylenedicarboxylate (0.085 g, 0.50 mmol), silacyclopropane **6** (0.168 g, 0.75 mmol), AgOTf (0.003 g, 0.01 mmol), and 6.7 mL of toluene for 12 h at 50 °C. Purification by flash chromatography (95:5 hexanes:EtOAc) afforded **13c** (0.157 g, 68%) as a colorless oil: <sup>1</sup>H NMR (400 MHz, CDCl<sub>3</sub>) δ 7.28–7.30 (m, 5H), 5.63 (s, 1H), 4.19–4.24 (m, 2H), 4.25–4.33 (m, 2H), 3.85 (d, *J* = 13.6, 1H), 3.75 (d, *J* = 13.5, 1H), 2.31 (s, 3H), 1.27–1.32 (m, 6H), 1.18 (s, 9H), 1.02 (s, 9H); <sup>13</sup>C NMR (125 MHz, CDCl<sub>3</sub>) δ 166.3, 166.0, 159.8, 139.2, 136.6, 128.6, 128.2, 127.0, 97.0, 61.3, 61.0, 57.5, 36.7, 27.7, 27.2, 22.4, 21.5, 14.2, 14.1; IR (thin film) 2924, 2709, 1730, 1470, 1062, 821 cm<sup>-1</sup>; HRMS (ESI) *m/z* calcd for C<sub>25</sub>H<sub>39</sub>NO<sub>5</sub>SiNa (M + Na)<sup>+</sup> 484.2495, found 484.2505. Anal. Calcd for C<sub>25</sub>H<sub>39</sub>NO<sub>5</sub>Si: C, 65.04; H, 8.51. Found: C, 65.16; H, 8.72.

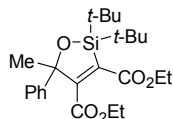**13d**

**Oxasilacyclopentene 13d.** The representative procedure for the synthesis of oxasilacyclopentenes was followed using acetophenone (0.129 g, 1.00 mmol), diethyl acetylenedicarboxylate (0.170 g, 1.00 mmol), silacyclopropane **6** (0.247 g, 1.10 mmol), AgOTf (0.003 g, 0.01 mmol), and 6.7 mL of toluene for 3 h. Purification by flash chromatography (95:5 hexanes:EtOAc) afforded **13d** (0.333 g, 77%) as a colorless oil: <sup>1</sup>H NMR (400 MHz, CDCl<sub>3</sub>) δ 7.24–7.49 (m, 5H), 4.23–4.32 (m, 4H), 2.62 (s, 3H), 1.32 (t, *J* = 7.1, 3H), 1.27 (t, *J* = 7.1, 3H), 1.12 (s, 9H), 0.95 (s, 9H); <sup>13</sup>C NMR (125 MHz, CDCl<sub>3</sub>) δ 168.0, 165.7, 159.4, 144.7, 138.4, 127.9, 127.3, 125.9, 88.2, 61.5, 60.9, 30.7, 28.0, 27.7, 21.3, 21.0, 14.3, 13.9; IR (thin film) 2969, 2860, 1720, 1240, 1037, 824 cm<sup>-1</sup>; HRMS (ESI) *m/z* calcd for C<sub>24</sub>H<sub>36</sub>O<sub>5</sub>SiNa (M + Na)<sup>+</sup> 455.2230, found 455.2220. Anal. Calcd for C<sub>24</sub>H<sub>36</sub>O<sub>5</sub>Si: C, 66.63; H, 8.39. Found: C, 66.61; H, 8.50.

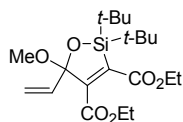**13e**

**Oxasilacyclopentene 13e.** The representative procedure for the synthesis of oxasilacyclopentenes was followed using methyl acrylate (0.344 g, 4.00 mmol), diethyl acetylenedicarboxylate (0.170 g, 1.00 mmol), silacyclopropane **6** (0.897 g, 4.00 mmol), AgOTf (0.003 g, 0.01 mmol), and 6.7 mL of toluene for 15 min. Purification by flash chromatography (95:5 hexanes:EtOAc) afforded **13e** (0.295 g, 74%) as a colorless oil: <sup>1</sup>H NMR (400 MHz, CDCl<sub>3</sub>) δ 6.15–6.22 (m, 1H), 5.66–5.71 (m, 1H), 5.43–5.46 (m,

1H), 4.21–4.28 (m, 4H), 3.28 (s, 3H), 1.28–1.32 (m, 6H), 1.14 (s, 9H), 1.08 (s, 9H);  $^{13}\text{C}$  NMR (125 MHz,  $\text{CDCl}_3$ )  $\delta$  167.6, 163.7, 153.3, 139.8, 134.5, 119.4, 106.5, 61.5, 61.0, 49.7, 27.7, 27.6, 21.1, 21.0, 14.2, 14.0; IR (thin film) 2936, 2861, 1732, 1243, 1059, 824  $\text{cm}^{-1}$ ; HRMS (ESI)  $m/z$  calcd for  $\text{C}_{20}\text{H}_{34}\text{O}_6\text{SiNa}$  ( $\text{M} + \text{Na}$ ) $^+$  421.2022, found 421.2019. Anal. Calcd for  $\text{C}_{20}\text{H}_{34}\text{O}_6\text{Si}$ : C, 60.27; H, 8.60. Found: C, 60.36; H, 8.76.

## II. Silacyclopropene Control Experiment

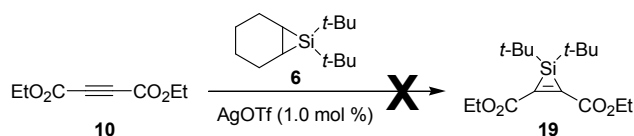

**Silacyclopropene control experiment.** To a J. Young tube was added diethyl acetylenedicarboxylate (0.017 g, 0.10 mmol), silacyclopropane **6** (0.022 g, 0.10 mmol), AgOTf (0.038 mL of a 0.026 M solution in benzene, 1.0  $\mu\text{mol}$ ), and 0.7 mL of benzene- $d_6$ . The progress of the reaction was monitored by  $^{29}\text{Si}$  NMR spectroscopy at ambient temperature. After 15 min, all starting material had disappeared and two new peaks had formed. Neither peaks were located in the silacyclopropene range<sup>3</sup> ( $\delta$  -71.7 to -65.3 ppm):  $^{29}\text{Si}$  NMR (99.3 MHz,  $\text{C}_6\text{D}_6$ )  $\delta$  18.0, 4.8.

## III. Oxasilacyclopentene functionalization

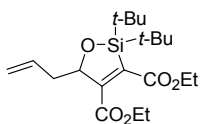

### 21

**Oxasilacyclopentene 21.** To a  $-78$   $^\circ\text{C}$  solution of oxasilacyclopentene **13b** (0.210 g, 0.54 mmol) and  $\text{SnBr}_4$  (0.475 g, 1.09 mmol) in 4.0 mL of  $\text{CH}_2\text{Cl}_2$  was added allyltrimethylsilane (0.35 mL, 2.17 mmol). The reaction mixture was warmed to ambient temperature and maintained for 48 h. The solution was diluted with 15 mL of  $\text{NaHCO}_3$ . The layers were separated, and the aqueous layer was extracted with  $\text{CH}_2\text{Cl}_2$  (3 x 15 mL). The combined organic layers were washed with 15 mL of saturated aqueous NaCl, dried ( $\text{Na}_2\text{SO}_4$ ), filtered, and concentrated *in vacuo*. The resultant yellow oil was purified by flash chromatography (95:5 hexanes:EtOAc) to afford **21** (0.132 g, 64%) as a colorless oil:  $^1\text{H}$  NMR (400 MHz,  $\text{CDCl}_3$ )  $\delta$  5.89–5.99 (m, 1H), 5.08–5.14 (m, 2H), 4.95–4.98 (m, 1H), 4.20–4.29 (m, 4H), 2.56–2.58 (m, 1H), 2.27–2.30 (m, 1H), 1.29–1.32 (m, 6H), 1.10 (s, 9H), 1.02 (s, 9H);  $^{13}\text{C}$  NMR (125 MHz,  $\text{CDCl}_3$ )  $\delta$  168.0, 164.4, 155.5, 138.4, 134.7, 117.4, 82.2, 61.4, 60.9, 40.3, 27.6, 27.1, 22.1, 20.7, 14.2, 14.0; IR (thin film) 2935, 2860, 1719, 1239, 1054, 824  $\text{cm}^{-1}$ ; HRMS (ESI)  $m/z$  calcd for  $\text{C}_{20}\text{H}_{34}\text{O}_5\text{SiNa}$  ( $\text{M} + \text{Na}$ ) $^+$  405.2073, found 405.2072. Anal. Calcd for  $\text{C}_{20}\text{H}_{34}\text{O}_5\text{Si}$ : C, 62.79; H, 8.96. Found: C, 62.77; H, 8.99.

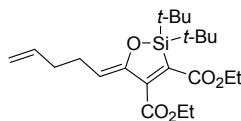**22**

**Oxasilacyclopentene 22.** To a  $-78\text{ }^{\circ}\text{C}$  solution of oxasilacyclopentene **13e** (0.100 g, 0.25 mmol) and  $\text{SnBr}_4$  (0.219 g, 0.50 mmol) in 2.0 mL of  $\text{CH}_2\text{Cl}_2$  was added allyltrimethylsilane (0.16 mL, 1.00 mmol). The reaction mixture was warmed to ambient temperature and maintained for 12 h. The solution was diluted with 10 mL of  $\text{NaHCO}_3$ . The layers were separated, and the aqueous layer was extracted with  $\text{CH}_2\text{Cl}_2$  (3 x 10 mL). The combined organic layers were washed with 10 mL of saturated aqueous  $\text{NaCl}$ , dried ( $\text{Na}_2\text{SO}_4$ ), filtered, and concentrated *in vacuo*. The resultant yellow oil was purified by flash chromatography (95:5 hexanes:EtOAc) to afford **22** (0.051 g, 50%) as a colorless oil:  $^1\text{H}$  NMR (400 MHz,  $\text{CDCl}_3$ )  $\delta$  5.83–5.85 (m, 1H), 4.99–5.06 (m, 3H), 4.20–4.36 (m, 4H), 2.35–2.39 (m, 2H), 2.18–2.19 (m, 2H), 1.28–1.37 (m, 6H), 1.08 (s, 18H);  $^{13}\text{C}$  NMR (125 MHz,  $\text{CDCl}_3$ )  $\delta$  166.3, 166.0, 155.0, 153.3, 138.3, 129.4, 114.9, 113.1, 61.7, 60.9, 33.2, 27.9, 27.8, 27.2, 25.3, 21.3, 14.2, 14.1; IR (thin film) 2935, 2861, 1738, 1239, 1090, 824  $\text{cm}^{-1}$ ; HRMS (ESI)  $m/z$  calcd for  $\text{C}_{22}\text{H}_{37}\text{O}_5\text{Si}$  ( $\text{M} + \text{H}$ ) $^+$  409.2410, found 409.2404.

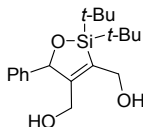**23**

**Diol 23.** To a  $-78\text{ }^{\circ}\text{C}$  solution of oxasilacyclopentene **11** (0.267 g, 0.64 mmol) in 5.0 mL of  $\text{CH}_2\text{Cl}_2$  was added DIBAL-H (2.56 mL of a 1.00 M solution in hexanes, 2.56 mmol). The reaction mixture was warmed to ambient temperature and maintained for 12 h. The solution was diluted with 10 mL of  $\text{H}_2\text{O}$  and 10 mL  $\text{NH}_4\text{Cl}$ . The layers were separated, and the aqueous layer was extracted with  $\text{CH}_2\text{Cl}_2$  (3 x 10 mL). The combined organic layers were washed with 10 mL of saturated aqueous  $\text{NaCl}$ , dried ( $\text{Na}_2\text{SO}_4$ ), filtered, and concentrated *in vacuo*. The resultant yellow oil was purified by flash chromatography (50:50 hexanes:EtOAc) to afford **23** (0.159 g, 74%) as a colorless oil:  $^1\text{H}$  NMR (400 MHz,  $\text{CDCl}_3$ )  $\delta$  7.27–7.35 (m, 5H), 5.56 (s, 1H), 4.58–4.59 (m, 2H), 4.11 (d,  $J = 13.2$ , 1H), 3.92 (d,  $J = 13.0$ , 1H), 2.48–2.66 (m, 2H), 1.12 (s, 9H), 1.09 (s, 9H);  $^{13}\text{C}$  NMR (125 MHz,  $\text{CDCl}_3$ )  $\delta$  156.4, 141.1, 137.5, 128.7, 128.4, 128.1, 86.4, 60.3, 59.1, 28.3, 27.6, 22.3, 20.5; IR (thin film) 3326 (br), 2954, 2870, 1266, 1047, 823  $\text{cm}^{-1}$ ; HRMS (ESI)  $m/z$  calcd for  $\text{C}_{19}\text{H}_{30}\text{O}_3\text{SiNa}$  ( $\text{M} + \text{Na}$ ) $^+$  357.1862, found 357.1862. Anal. Calcd for  $\text{C}_{19}\text{H}_{30}\text{O}_3\text{Si}$ : C, 68.22; H, 9.04. Found: C, 67.96; H, 9.17.

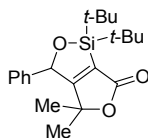

## 24

**Lactone 24.** To a solution of oxasilacyclopentene **11** (0.268 g, 0.64 mmol) in 4.3 mL of THF was added MeMgBr (1.37 mL of a 1.40 M solution in THF, 1.92 mmol). The colorless solution was maintained at ambient temperature for 3 h, at which point the mixture was diluted with 10 mL of NH<sub>4</sub>Cl. The layers were separated, and the aqueous layer was extracted with hexanes (3 x 10 mL). The combined organic layers were washed with 10 mL of saturated aqueous NaCl, dried (Na<sub>2</sub>SO<sub>4</sub>), filtered, and concentrated *in vacuo*. The resultant yellow oil was purified by flash chromatography (95:5 hexanes:EtOAc) to afford **24** (0.161 g, 70%) as a white solid: mp 109 °C; <sup>1</sup>H NMR (400 MHz, CDCl<sub>3</sub>) δ 7.38–7.40 (m, 5H), 5.75 (s, 1H), 1.50 (s, 3H), 1.22 (s, 9H), 1.12 (s, 9H), 0.87 (s, 3H); <sup>13</sup>C NMR (125 MHz, CDCl<sub>3</sub>) δ 195.8, 170.1, 138.2, 130.5, 129.3, 129.0, 127.6, 86.0, 81.3, 27.9, 27.1, 26.0, 25.6, 22.4, 20.3; IR (thin film) 2933, 2859, 1755, 1270, 1018, 823 cm<sup>-1</sup>; HRMS (ESI) *m/z* calcd for C<sub>21</sub>H<sub>30</sub>O<sub>3</sub>SiNa (M + Na)<sup>+</sup> 381.1862, found 381.1866. Anal. Calcd for C<sub>21</sub>H<sub>30</sub>O<sub>3</sub>Si: C, 70.35; H, 8.43. Found: C, 70.08; H, 8.43.

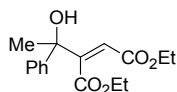

## 25

**Alcohol 25.** To a solution of tetrabutylammonium fluoride (0.60 mL of a 1.0 M solution in THF, 0.60 mmol) and Pd(dba)<sub>2</sub> (0.018 g, 0.03 mmol) in 3.0 mL of THF was added a solution of oxasilacyclopentene **11** (0.125 g, 0.30 mmol) in 1.0 mL of THF. The solution was maintained at ambient temperature for 12 h, at which point the mixture was diluted with 15 mL of H<sub>2</sub>O and 15 mL of MTBE. The layers were separated, and the aqueous layer was extracted with MTBE (3 x 15 mL). The combined organic layers were washed with H<sub>2</sub>O (5 x 15 mL) followed by 15 mL of saturated aqueous NaCl, dried (Na<sub>2</sub>SO<sub>4</sub>), filtered, and concentrated *in vacuo*. The resultant yellow oil was purified by flash chromatography (60:40 hexanes:EtOAc) to afford **25** (0.059 g, 67%) as a colorless oil: <sup>1</sup>H NMR (400 MHz, CDCl<sub>3</sub>) δ 7.44–7.47 (m, 2H), 7.36–7.38 (m, 2H), 7.27–7.31 (m, 1H), 6.13 (s, 1H), 4.10–4.22 (m, 4H), 3.17 (br s, 1H), 1.80 (s, 3H), 1.29 (t, *J* = 7.2, 3H), 1.10 (t, *J* = 7.1, 3H); <sup>13</sup>C NMR (125 MHz, CDCl<sub>3</sub>) δ 167.8, 165.1, 135.3, 143.8, 128.4, 127.8, 125.6, 120.2, 75.6, 61.6, 61.1, 28.3, 14.1, 13.7. <sup>1</sup>H and <sup>13</sup>C NMR spectroscopic data matched those previously reported.<sup>4</sup>

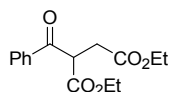

## 27

**Ketone 27.** To a solution of tetrabutylammonium fluoride (0.48 mL of a 1.0 M solution in THF, 0.48 mmol) and Pd(dba)<sub>2</sub> (0.014 g, 0.02 mmol) in 2.0 mL of THF was added a solution of oxasilacyclopentene **11** (0.100 g, 0.24 mmol) in 1.0 mL of THF. The solution was maintained at ambient temperature for 12 h, at which point the mixture was diluted with 10 mL of H<sub>2</sub>O and 10 mL of

MTBE. The layers were separated, and the aqueous layer was extracted with MTBE (3 x 10 mL). The combined organic layers were washed with H<sub>2</sub>O (5 x 10 mL) followed by 10 mL of saturated aqueous NaCl, dried (Na<sub>2</sub>SO<sub>4</sub>), filtered, and concentrated *in vacuo*. The resultant yellow oil was purified by flash chromatography (78:20:2 hexanes:CH<sub>2</sub>Cl<sub>2</sub>:NEt<sub>3</sub>) to afford **27** (0.037 g, 58%) as a colorless oil: <sup>1</sup>H NMR (400 MHz, CDCl<sub>3</sub>) δ 8.03–8.06 (m, 2H), 7.59–7.61 (m, 1H), 7.48–7.52 (m, 2H), 4.87 (dd, *J* = 7.7, 6.7, 1H), 4.11–4.18 (m, 4H), 2.99–3.13 (m, 2H), 1.24 (t, *J* = 7.1, 3H), 1.16 (t, *J* = 7.1, 3H); <sup>13</sup>C NMR (125 MHz, CDCl<sub>3</sub>) δ 194.3, 171.3, 168.8, 136.0, 133.7, 128.9, 128.8, 61.9, 61.1, 49.7, 33.3, 14.1, 14.0. <sup>1</sup>H and <sup>13</sup>C NMR spectroscopic data matched those previously reported.<sup>5</sup>

#### IV. Stereochemical Proofs of Dioxasilacyclopentanes

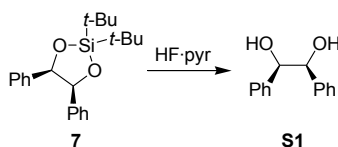

**Diol S1.** The stereochemistry of dioxasilacyclopentane **7** was determined by hydrolysis to afford known diol **S1**. The stereochemistry of **S1** was determined by <sup>1</sup>H NMR spectroscopic analysis and comparison to literature values.<sup>6,7</sup>

**Dioxasilacyclopentane 5.** The stereochemistry of dioxasilacyclopentane **9** was determined using DPGSE-nuclear Overhauser effect (nOe) enhancements.

**Figure S1.** Relevant DPGSE-nOe data (mixing time 0.5 s):

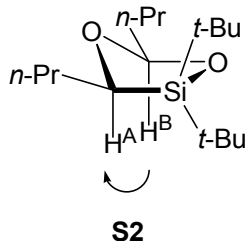

**H<sup>A</sup>** irradiated: **H<sup>B</sup>** (1.7%)  
**H<sup>B</sup>** irradiated: **H<sup>A</sup>** (1.6%)

#### V. References

- (1) Driver, T. G.; Franz, A. K.; Woerpel, K. A. *J. Am. Chem. Soc.* **2002**, *124*, 6524–6525.
- (2) Boudjouk, P.; Black, E.; Kumarathasan, R. *Organometallics* **1991**, *10*, 2095–2096.
- (3) Palmer, W. S.; Woerpel, K. A. *Organometallics* **1997**, *16*, 4824–4827.
- (4) Harrowven, D. C.; Poon, H. S. *Tetrahedron* **1996**, *52*, 1389–1398.
- (5) Mattson, A. E.; Bharadwaj, A. R.; Scheidt, K. J. *J. Am. Chem. Soc.* **2004**, *126*, 2314–2315.
- (6) Corey, E. J.; Hopkins, P. B. *Tetrahedron. Lett.* **1982**, *23*, 4871–4874.
- (7) Clerici, A.; Porta, O. *J. Org. Chem.* **1985**, *50*, 76–81.



## VI. Selected Spectra

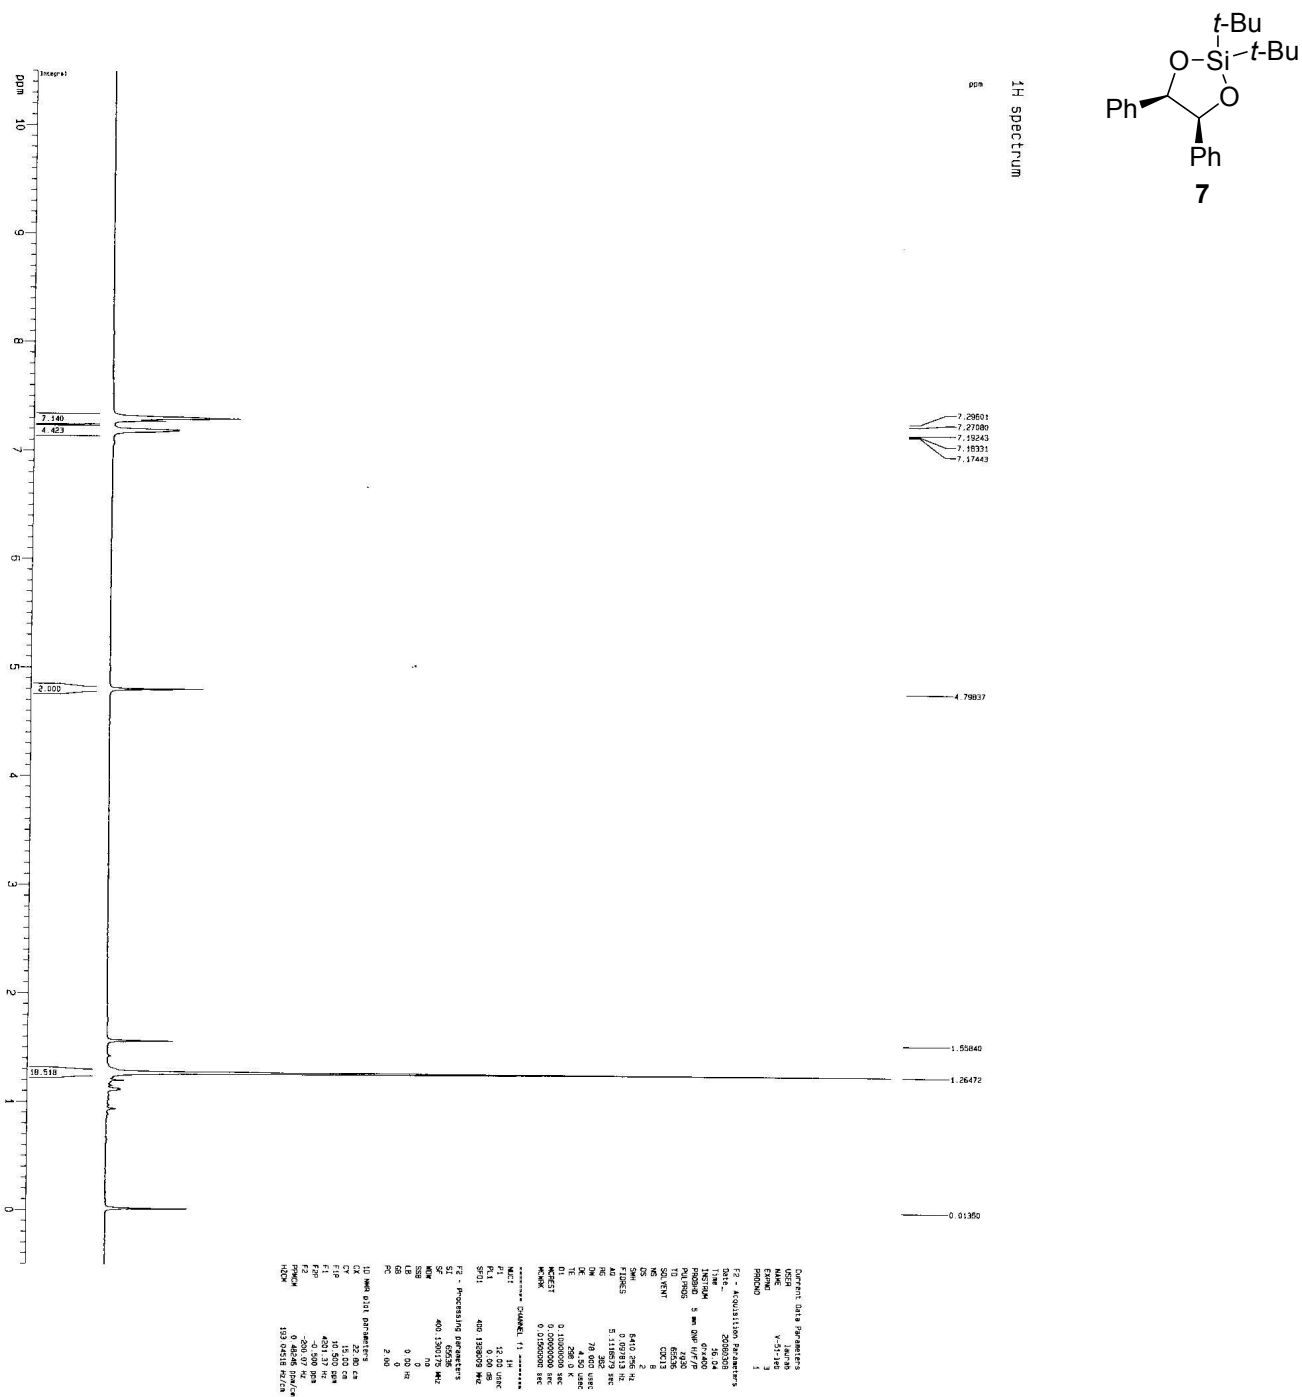

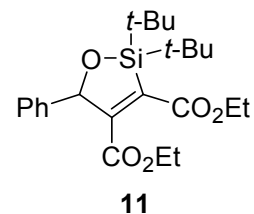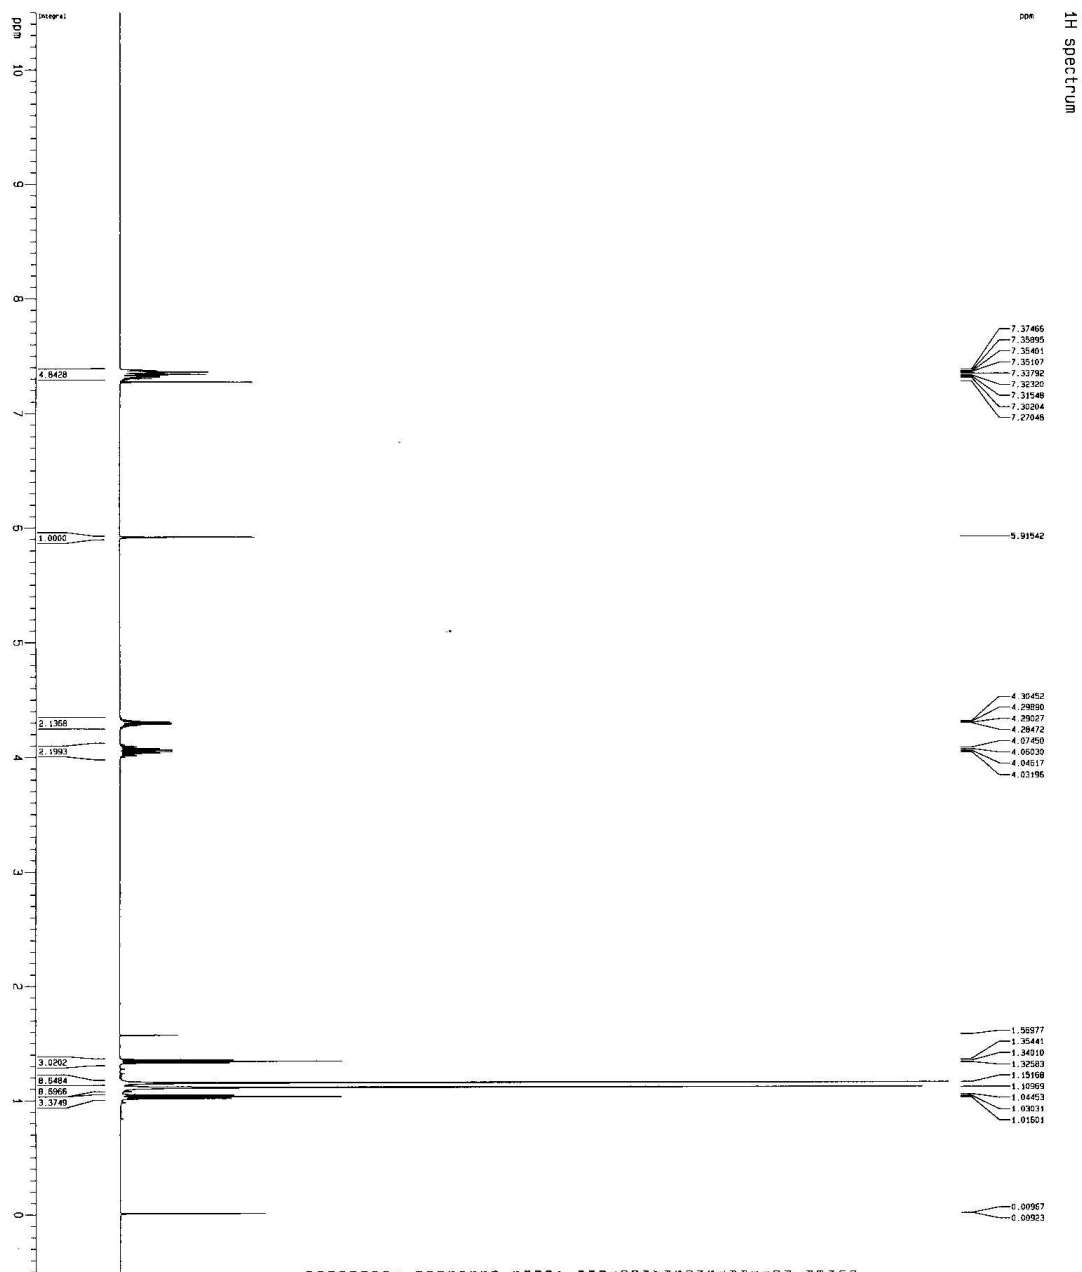

```

Current Data Parameters
NAME      V-24-11a
EXPNO    1
PROCNO   1
F2 - Acquisition Parameters
Date_    20111111
Time     21:11
INSTRUM  cryosol
PROBHD   5 mm QNP1H/
PULPROG  zgpg30
TD        65536
SOLVENT  CDCl3
NS       2
DS       2
SWH      8012.820 Hz
FIDRES   0.0001000 Hz
AQ       5.0993388 sec
RG       4.0
AQ2      4.0
RG2      4.0
DE       6.00 usec
TE       300.2 K
NUC1      13C
NUC2      1H
KINETST  0.0000000 sec
MKRSST   0.0100000 sec
***** CHANNEL f1 *****
NUC1      13C
P1        7.00 usec
PL1       0.00 dB
SFO1      500.261510 MHz
F2 - Processing parameters
SI        500.261510 MHz
WDW       EM
SSB       0
RG         4.0
DE         6.0
TE         300.2
PC         4.00
ID: NMR 011C parameters
CT         22.00 cm
CF         125.00 cm
FIDRES     0.0001000 Hz
F1         500.261510 MHz
F2         500.130610 MHz
P1         7.00 usec
P1CH1     0.0000000 usec
P1CH2     0.0000000 usec
P1CH3     0.0000000 usec
P1CH4     0.0000000 usec
P1CH5     0.0000000 usec
P1CH6     0.0000000 usec
P1CH7     0.0000000 usec
P1CH8     0.0000000 usec
P1CH9     0.0000000 usec
P1CH10    0.0000000 usec
P1CH11    0.0000000 usec
P1CH12    0.0000000 usec
P1CH13    0.0000000 usec
P1CH14    0.0000000 usec
P1CH15    0.0000000 usec
P1CH16    0.0000000 usec
P1CH17    0.0000000 usec
P1CH18    0.0000000 usec
P1CH19    0.0000000 usec
P1CH20    0.0000000 usec
P1CH21    0.0000000 usec
P1CH22    0.0000000 usec
P1CH23    0.0000000 usec
P1CH24    0.0000000 usec
P1CH25    0.0000000 usec
P1CH26    0.0000000 usec
P1CH27    0.0000000 usec
P1CH28    0.0000000 usec
P1CH29    0.0000000 usec
P1CH30    0.0000000 usec
P1CH31    0.0000000 usec
P1CH32    0.0000000 usec
P1CH33    0.0000000 usec
P1CH34    0.0000000 usec
P1CH35    0.0000000 usec
P1CH36    0.0000000 usec
P1CH37    0.0000000 usec
P1CH38    0.0000000 usec
P1CH39    0.0000000 usec
P1CH40    0.0000000 usec
P1CH41    0.0000000 usec
P1CH42    0.0000000 usec
P1CH43    0.0000000 usec
P1CH44    0.0000000 usec
P1CH45    0.0000000 usec
P1CH46    0.0000000 usec
P1CH47    0.0000000 usec
P1CH48    0.0000000 usec
P1CH49    0.0000000 usec
P1CH50    0.0000000 usec
P1CH51    0.0000000 usec
P1CH52    0.0000000 usec
P1CH53    0.0000000 usec
P1CH54    0.0000000 usec
P1CH55    0.0000000 usec
P1CH56    0.0000000 usec
P1CH57    0.0000000 usec
P1CH58    0.0000000 usec
P1CH59    0.0000000 usec
P1CH60    0.0000000 usec
P1CH61    0.0000000 usec
P1CH62    0.0000000 usec
P1CH63    0.0000000 usec
P1CH64    0.0000000 usec
P1CH65    0.0000000 usec
P1CH66    0.0000000 usec
P1CH67    0.0000000 usec
P1CH68    0.0000000 usec
P1CH69    0.0000000 usec
P1CH70    0.0000000 usec
P1CH71    0.0000000 usec
P1CH72    0.0000000 usec
P1CH73    0.0000000 usec
P1CH74    0.0000000 usec
P1CH75    0.0000000 usec
P1CH76    0.0000000 usec
P1CH77    0.0000000 usec
P1CH78    0.0000000 usec
P1CH79    0.0000000 usec
P1CH80    0.0000000 usec
P1CH81    0.0000000 usec
P1CH82    0.0000000 usec
P1CH83    0.0000000 usec
P1CH84    0.0000000 usec
P1CH85    0.0000000 usec
P1CH86    0.0000000 usec
P1CH87    0.0000000 usec
P1CH88    0.0000000 usec
P1CH89    0.0000000 usec
P1CH90    0.0000000 usec
P1CH91    0.0000000 usec
P1CH92    0.0000000 usec
P1CH93    0.0000000 usec
P1CH94    0.0000000 usec
P1CH95    0.0000000 usec
P1CH96    0.0000000 usec
P1CH97    0.0000000 usec
P1CH98    0.0000000 usec
P1CH99    0.0000000 usec
P1CH100   0.0000000 usec
    
```



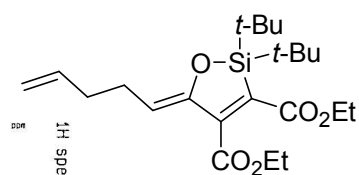

**22**

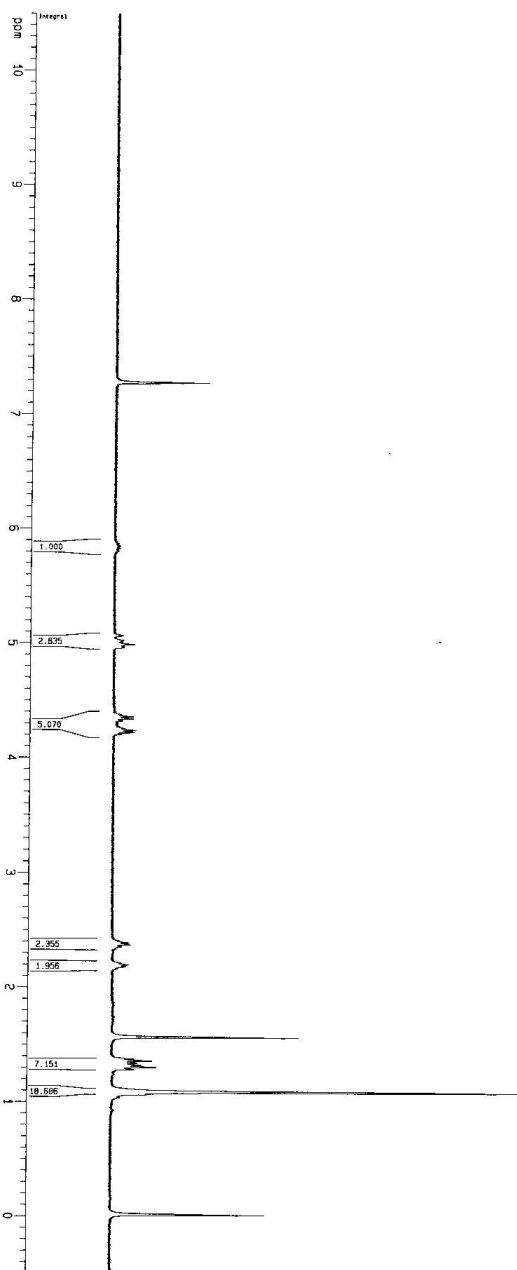

7.27071

1.95013  
1.35523  
1.31736  
0.82224  
0.00058

```

Current Data Parameters
NAME      V-33746
EXPNO     2
PROCNO    1
F2 - Acquisition Parameters
Date_     20140618
Time      16:13
INSTRUM   cryaco
PULPROG   zgpg30
TD         65536
AQ         5.118979 sec
RG         4096
SFO        500.136070 MHz
NUC1       13C
NUC2       13C
PC         2.00
===== CHANNEL f1 =====
NUC1       13C
P1         12.00 nsec
PL1        0.00 dB
SFO1       125.761 MHz
===== CHANNEL f2 =====
NAME      13C
P1         12.00 nsec
PL1        0.00 dB
SFO1       125.761 MHz
F2 - Processing parameters
SI         32768
SF         500.136070 MHz
WDW        EM
SSB        0
GB         0
PC         2.00
===== CHANNEL PARAMETERS =====
CH1
CX         22.80 cm
CZ         7.25 cm
F1         10.00 MHz
F2         420.137 MHz
P2         -30.000 dBm
P1CORR    0.000000 dBc
P2CORR    0.000000 dBc
P1GAIN     181.14818 Hz/Ga
P2GAIN     181.14818 Hz/Ga
    
```

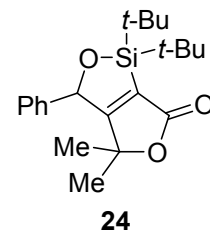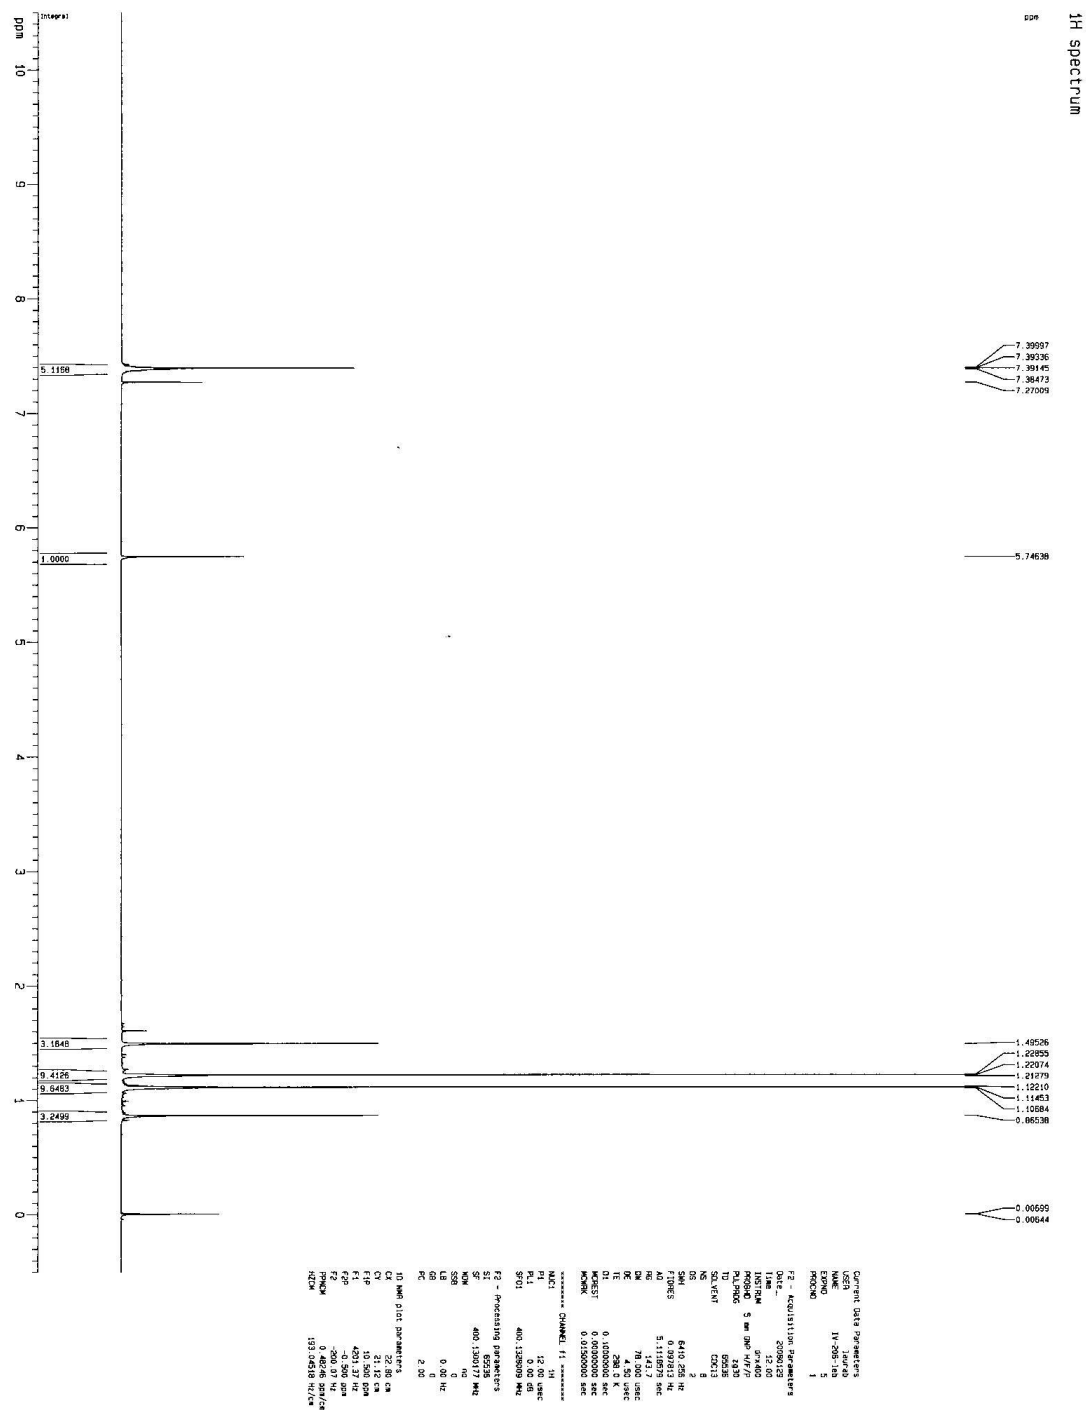

Supplement: NIHMS91107-supplement-1_si_001.pdf [file NIHMS91107-supplement-1_si_001.pdf]
